# Supplementary material for: Helicobacter pylori prevalence in healthy Mexican children: comparison between two non-invasive methods
Source: PeerJ. 2021 Jun 28;9:e11546. doi: 10.7717/peerj.11546 (PMC8247697; doi:10.7717/peerj.11546)
Supplement: Supplemental Information 1 — Raw data obtained from the PCR and stool antigen tests, as well as from the poll. [file peerj-09-11546-s001.xlsx]

## Sheet: Page 1
Folio number	PCR_dental plaque	PCR_saliva	Ag in feces	HP_status	Sex	Age (years)	Schooling	Crowding	Place_of _origin	Sicknesses	Vomit	Nausea	Belching	Stomachache	Heartburn	Diarrhea
EPDD-083	negative	positive	negative	positive	femenine	10	primary	unfavorable	rural	no	no	no	no	no	no	no
EPDD-048	negative	negative	negative	negative	femenine	7	primary	unfavorable	rural	no	no	yes	no	no	no	no
EPDD-115	no sample	no sample	negative	negative	masculine	10	primary	favorable	rural	no	no	no	no	no	no	no
EPDD-042	negative	no sample	negative	negative	masculine	8	primary	favorable	rural	no	no	yes	no	no	no	no
EPDD-064	no sample	no sample	negative	negative	femenine	9	primary	unfavorable	rural	no	no	no	no	no	no	no
EPDD-098	positive	no sample	negative	positive	femenine	8	primary	favorable	rural	no	no	no	no	no	no	no
EPDD-143	positive	negative	negative	positive	femenine	9	primary	favorable	rural	no	no	no	no	no	no	no
EPDD-024	positive	positive	negative	positive	femenine	6	primary	unfavorable	rural	no	no	no	no	no	no	no
EPDD-038	no sample	negative	negative	negative	masculine	8	primary	favorable	rural	no	no	no	no	no	no	no
EPDD-019	positive	positive	negative	positive	masculine	7	primary	favorable	rural	no	no	no	no	no	no	no
EPDD-001	negative	negative	negative	negative	masculine	6	primary	favorable	rural	no	no	no	no	no	no	no
EPDD-072	negative	negative	negative	negative	masculine	8	primary	favorable	rural	no	no	no	no	yes	no	no
EPDD-055	negative	negative	negative	negative	masculine	9	primary	unfavorable	rural	no	no	no	no	yes	yes	yes
EPDD-095	negative	negative	negative	negative	femenine	9	primary	favorable	rural	yes	yes	yes	no	yes	no	no
EPDD-028	positive	negative	negative	positive	femenine	7	primary	unfavorable	rural	no	no	no	no	yes	no	no
EPDD-075	negative	negative	negative	negative	femenine	9	primary	favorable	rural	no	no	no	no	no	no	no
EPDD-056	negative	no sample	negative	negative	femenine	9	primary	favorable	rural	no	no	no	no	yes	no	no
EPDD-156	no sample	negative	negative	negative	femenine	12	primary	favorable	rural	yes	no	no	no	yes	yes	no
EPDD-006	negative	negative	negative	negative	femenine	7	primary	favorable	rural	no	no	no	no	no	no	yes
EPDD-138	negative	negative	negative	negative	masculine	7	primary	favorable	rural	no	no	no	no	no	no	no
EPDD-045	no sample	negative	negative	negative	femenine	8	primary	favorable	rural	no	no	no	no	no	no	no
UAO-016	no sample	no sample	negative	negative	masculine	6	primary	unfavorable	urban	no	no	no	no	yes	no	no
EPDD-036	positive	negative	negative	positive	femenine	8	primary	unfavorable	rural	no	no	no	no	no	no	no
EPDD-031	positive	negative	negative	positive	femenine	7	primary	favorable	rural	no	no	no	no	no	no	no
EPDD-105	no sample	negative	negative	negative	femenine	10	primary	favorable	rural	no	no	no	no	no	no	no
EPDD-063	negative	no sample	negative	negative	femenine	8	primary	favorable	rural	yes	no	no	no	no	no	no
UAO-011	no sample	no sample	negative	negative	femenine	6	primary	unfavorable	rural	no	no	no	yes	no	no	no
UAO-010	no sample	no sample	negative	negative	masculine	12	secundar	unfavorable	urban	no	no	no	no	no	no	no
EPDD-020	no sample	positive	negative	positive	femenine	7	primary	favorable	rural	no	no	no	no	no	no	no
EPDD-071	no sample	negative	negative	negative	masculine	8	primary	favorable	rural	yes	no	no	no	no	no	no
EPDD-008	positive	negative	negative	positive	femenine	7	primary	favorable	rural	no	no	no	no	no	no	no
EPDD-126	negative	negative	negative	negative	femenine	12	primary	favorable	rural	no	no	no	no	no	no	no
EPDD-155	no sample	no sample	negative	negative	femenine	8	primary	unfavorable	rural	no	no	no	no	no	no	yes
EPDD-107	negative	no sample	negative	negative	femenine	10	primary	unfavorable	rural	no	no	no	no	no	no	no
UAO-021	no sample	no sample	negative	negative	masculine	12	secundar	favorable	urban	no	no	no	no	no	no	no
EPDD-154	no sample	no sample	negative	negative	femenine	8	primary	unfavorable	rural	no	no	no	no	yes	no	no
EPDD-073	positive	no sample	negative	positive	femenine	9	primary	unfavorable	rural	no	no	no	no	no	no	no
EPDD-017	positive	negative	negative	positive	femenine	7	primary	favorable	rural	no	no	no	no	no	no	no
EPDD-132	no sample	no sample	negative	negative	masculine	10	primary	unfavorable	rural	yes	no	no	no	no	no	no
EPDD-054	negative	negative	negative	negative	femenine	9	primary	favorable	rural	no	no	no	no	no	no	no
EPDD-004	negative	negative	negative	negative	masculine	9	primary	favorable	rural	no	no	no	no	no	no	no
EPDD-114	no sample	negative	negative	negative	masculine	11	primary	unfavorable	rural	no	no	no	no	no	no	no
EPDD-151	no sample	no sample	negative	negative	femenine	11	primary	favorable	rural	yes	no	no	no	no	no	no
EPDD-153	negative	negative	negative	negative	masculine	9	primary	unfavorable	rural	no	no	no	no	no	no	no
EPDD-145	negative	negative	negative	negative	masculine	11	primary	favorable	rural	yes	no	no	no	no	no	yes
EPDD-119	negative	negative	negative	negative	femenine	11	primary	unfavorable	rural	no	no	no	no	yes	no	no
EPDD-141	positive	negative	negative	positive	femenine	8	primary	favorable	rural	no	no	no	no	yes	no	no
EPDD-027	positive	negative	negative	positive	femenine	7	primary	favorable	rural	no	no	no	no	no	yes	no
EPDD-144	negative	negative	negative	negative	femenine	9	primary	favorable	rural	no	no	no	yes	no	no	no
EPDD-122	no sample	negative	negative	negative	masculine	12	primary	favorable	rural	no	no	no	no	yes	no	no
EPDD-110	no sample	no sample	negative	negative	masculine	10	primary	favorable	rural	no	no	no	no	no	no	no
EPDD-050	negative	negative	negative	negative	masculine	7	primary	favorable	rural	no	no	no	no	no	no	no
EPDD-002	negative	negative	negative	negative	masculine	6	primary	favorable	rural	yes	no	yes	no	no	no	no
EPDD-010	positive	negative	negative	positive	masculine	7	primary	favorable	rural	no	no	no	no	no	no	no
EPDD-033	positive	negative	negative	positive	femenine	7	primary	unfavorable	rural	no	no	no	no	no	no	no
EPDD-088	negative	negative	negative	negative	masculine	9	primary	favorable	rural	no	no	no	no	no	no	no
EPDD-133	negative	no sample	negative	negative	femenine	8	primary	unfavorable	rural	no	no	no	no	yes	no	no
EPDD-081	positive	positive	negative	positive	femenine	9	primary	unfavorable	rural	no	no	no	no	no	no	no
EPDD-035	positive	negative	negative	positive	femenine	7	primary	unfavorable	rural	no	no	no	no	no	no	no
EPDD-137	no sample	negative	negative	negative	masculine	8	primary	favorable	rural	no	no	no	no	no	no	no
EPDD-104	no sample	no sample	negative	negative	masculine	10	primary	unfavorable	rural	no	no	no	no	no	no	no
EPDD-023	positive	positive	negative	positive	femenine	6	primary	unfavorable	rural	no	no	no	yes	yes	no	no
EPDD-046	positive	no sample	negative	positive	masculine	7	primary	unfavorable	rural	no	no	no	no	no	no	no
EPDD-108	no sample	no sample	negative	negative	femenine	9	primary	unfavorable	rural	no	no	no	no	yes	no	no
EPDD-135	negative	negative	negative	negative	femenine	8	primary	unfavorable	rural	yes	no	no	no	yes	no	no
EPDD-134	no sample	negative	negative	negative	masculine	8	primary	unfavorable	rural	no	no	no	no	no	no	no
EPDD-041	negative	negative	negative	negative	femenine	7	primary	favorable	rural	no	no	yes	no	no	no	no
EPDD-037	no sample	negative	negative	negative	masculine	7	primary	unfavorable	rural	no	yes	no	yes	yes	no	no
EPDD-140	positive	negative	negative	positive	femenine	9	primary	favorable	rural	no	no	no	no	no	no	no
EPDD-053	negative	positive	negative	positive	masculine	8	primary	favorable	rural	no	no	no	yes	no	no	no
EPDD-070	negative	negative	positive	positive	femenine	10	primary	unfavorable	rural	yes	no	no	no	no	no	no
EPDD-117	positive	no sample	positive	positive	masculine	10	primary	unfavorable	rural	no	no	no	no	yes	no	no
EPDD-128	positive	positive	positive	positive	femenine	12	primary	unfavorable	rural	no	no	no	no	no	no	no
EPDD-058	negative	positive	positive	positive	femenine	8	primary	unfavorable	rural	no	no	no	no	yes	no	no
EPDD-011	negative	positive	positive	positive	femenine	6	primary	favorable	rural	no	no	no	yes	no	no	no
EPDD-130	negative	no sample	positive	positive	masculine	12	primary	unfavorable	rural	no	no	no	no	yes	no	yes
EPDD-016	no sample	negative	positive	positive	femenine	6	primary	unfavorable	rural	no	no	no	no	no	no	no
EPDD-026	positive	positive	positive	positive	femenine	8	primary	unfavorable	rural	yes	no	no	yes	yes	no	yes
EPDD-022	no sample	positive	positive	positive	femenine	7	primary	favorable	rural	no	no	no	yes	no	no	no
EPDD-112	no sample	negative	positive	positive	masculine	10	primary	favorable	rural	yes	no	no	no	no	no	no
EPDD-043	no sample	negative	positive	positive	femenine	8	primary	favorable	rural	no	no	no	no	no	no	no
EPDD-078	negative	negative	positive	positive	masculine	9	primary	favorable	rural	no	no	no	no	no	no	no
EPDD-152	no sample	negative	positive	positive	masculine	8	primary	unfavorable	rural	no	no	no	no	no	no	no
EPDD-149	no sample	no sample	positive	positive	masculine	12	primary	favorable	rural	no	no	no	no	yes	yes	no
EPDD-120	no sample	negative	positive	positive	femenine	12	primary	favorable	rural	no	no	no	no	no	no	no
EPDD-003	positive	positive	positive	positive	femenine	6	primary	unfavorable	rural	no	no	no	no	yes	no	no
EPDD-015	positive	negative	positive	positive	femenine	7	primary	unfavorable	rural	no	no	no	no	no	no	no
EPDD-092	no sample	negative	positive	positive	masculine	10	primary	unfavorable	rural	no	no	no	yes	yes	no	no
EPDD-068	negative	no sample	positive	positive	femenine	9	primary	unfavorable	rural	no	no	no	yes	yes	no	no
EPDD-018	negative	negative	positive	positive	femenine	7	primary	unfavorable	rural	no	yes	no	no	yes	no	no
EPDD-040	negative	negative	positive	positive	masculine	7	primary	unfavorable	rural	no	no	no	no	no	no	no
EPDD-086	negative	negative	positive	positive	masculine	10	primary	favorable	rural	no	no	no	no	no	no	no
EPDD-109	no sample	no sample	positive	positive	masculine	11	primary	unfavorable	rural	no	no	no	no	no	no	no
EPDD-051	negative	negative	positive	positive	masculine	8	primary	favorable	rural	yes	no	no	no	no	no	no
EPDD-106	no sample	negative	positive	positive	femenine	10	primary	favorable	rural	no	no	no	no	no	no	no
EPDD-014	no sample	no sample	positive	positive	femenine	6	primary	favorable	rural	no	no	no	no	no	no	no
UAO-003	no sample	no sample	positive	positive	femenine	10	primary	unfavorable	urban	no	no	no	no	no	no	no
EPDD-060	negative	positive	positive	positive	femenine	9	primary	unfavorable	rural	no	no	no	no	no	no	no
EPDD-123	negative	negative	positive	positive	femenine	11	primary	favorable	rural	no	no	no	yes	yes	no	no
EPDD-121	positive	no sample	positive	positive	femenine	12	primary	favorable	rural	no	no	yes	no	no	no	no
EPDD-148	negative	no sample	positive	positive	femenine	9	primary	unfavorable	rural	no	no	no	no	yes	no	no
EPDD-102	no sample	no sample	positive	positive	masculine	11	primary	unfavorable	rural	yes	no	no	no	no	yes	no
EPDD-067	positive	no sample	positive	positive	masculine	8	primary	favorable	rural	yes	yes	no	no	yes	no	no
EPDD-087	negative	negative	positive	positive	masculine	9	primary	unfavorable	rural	no	no	yes	no	yes	no	no
EPDD-069	negative	negative	positive	positive	femenine	8	primary	unfavorable	rural	no	no	no	no	no	no	no
EPDD-103	negative	negative	positive	positive	femenine	11	primary	favorable	rural	no	yes	yes	no	yes	no	no
EPDD-032	positive	positive	positive	positive	femenine	8	primary	favorable	urban	no	yes	no	no	yes	no	no
EPDD-084	negative	positive	positive	positive	femenine	9	primary	unfavorable	rural	no	no	no	no	no	no	no
EPDD-139	negative	negative	positive	positive	femenine	10	primary	unfavorable	rural	no	no	no	no	no	no	no
EPDD-049	negative	negative	positive	positive	masculine	8	primary	unfavorable	rural	no	no	no	no	no	no	no
EPDD-118	no sample	no sample	positive	positive	masculine	10	primary	favorable	rural	yes	no	no	no	no	no	no
EPDD-034	negative	negative	positive	positive	femenine	7	primary	favorable	rural	no	no	no	no	no	no	no
EPDD-085	negative	positive	positive	positive	femenine	10	primary	favorable	rural	no	no	no	no	no	no	no
EPDD-029	positive	negative	positive	positive	masculine	7	primary	favorable	rural	no	no	no	no	no	no	no
EPDD-125	no sample	negative	positive	positive	femenine	11	primary	favorable	rural	no	no	no	no	yes	no	no
EPDD-113	no sample	no sample	positive	positive	masculine	10	primary	unfavorable	rural	no	no	no	no	yes	no	no
EPDD-052	negative	negative	positive	positive	masculine	8	primary	unfavorable	rural	no	no	no	no	no	no	no
EPDD-061	negative	negative	positive	positive	masculine	9	primary	unfavorable	rural	no	no	no	no	no	no	no
EPDD-012	positive	negative	positive	positive	masculine	7	primary	favorable	rural	no	no	no	yes	no	no	no
EPDD-044	negative	no sample	positive	positive	masculine	7	primary	favorable	rural	no	no	no	no	no	no	no
EPDD-007	negative	negative	positive	positive	femenine	7	primary	favorable	rural	no	no	no	yes	no	no	no
EPDD-009	positive	negative	positive	positive	femenine	6	primary	unfavorable	rural	no	no	no	no	yes	yes	no
EPDD-129	negative	negative	positive	positive	masculine	11	primary	favorable	rural	no	no	no	no	no	no	no
EPDD-142	negative	negative	positive	positive	masculine	12	primary	unfavorable	rural	no	no	no	yes	no	yes	no
EPDD-100	negative	no sample	positive	positive	femenine	8	primary	unfavorable	rural	no	no	no	no	yes	no	no
EPDD-074	negative	no sample	positive	positive	femenine	8	primary	unfavorable	rural	no	no	no	no	no	no	no
EPDD-025	negative	negative	positive	positive	masculine	6	primary	favorable	rural	no	no	no	no	no	no	no
EPDD-101	negative	negative	positive	positive	femenine	6	primary	unfavorable	rural	yes	no	no	no	no	no	no
UAO-008	no sample	no sample	positive	positive	masculine	9	primary	favorable	urban	no	no	no	no	no	yes	no
EPDD-059	negative	positive	positive	positive	femenine	8	primary	favorable	rural	no	no	no	no	no	no	no
EPDD-146	no sample	no sample	positive	positive	femenine	11	primary	favorable	rural	no	no	no	no	no	no	no
EPDD-097	negative	negative	positive	positive	femenine	7	primary	unfavorable	rural	no	no	no	no	no	no	no
EPDD-013	no sample	negative	positive	positive	femenine	7	primary	favorable	rural	no	no	no	no	no	no	no
EPDD-089	no sample	negative	positive	positive	masculine	9	primary	favorable	rural	no	no	no	yes	no	no	no
EPDD-090	no sample	negative	positive	positive	femenine	10	primary	favorable	rural	no	no	no	no	no	no	no
EPDD-065	no sample	no sample	positive	positive	masculine	8	primary	favorable	rural	no	no	no	no	no	no	no
EPDD-077	negative	no sample	positive	positive	femenine	10	primary	unfavorable	rural	no	no	no	no	no	no	no
EPDD-111	no sample	no sample	positive	positive	femenine	11	primary	unfavorable	rural	yes	no	no	yes	yes	yes	no
EPDD-124	positive	negative	positive	positive	femenine	12	primary	unfavorable	rural	no	no	no	no	yes	no	no
EPDD-021	negative	positive	positive	positive	femenine	6	primary	unfavorable	rural	no	no	no	no	yes	no	yes
EPDD-047	negative	negative	positive	positive	masculine	8	primary	unfavorable	rural	no	no	no	no	yes	no	no
EPDD-005	negative	negative	positive	positive	femenine	6	primary	favorable	rural	no	no	no	no	yes	no	no
EPDD-057	negative	positive	positive	positive	femenine	8	primary	favorable	rural	no	no	no	no	yes	no	yes
EPDD-096	negative	negative	positive	positive	femenine	7	primary	unfavorable	rural	no	no	no	yes	yes	no	no
EPDD-082	negative	no sample	positive	positive	femenine	9	primary	unfavorable	rural	no	no	no	no	no	no	no
EPDD-066	positive	negative	positive	positive	femenine	9	primary	unfavorable	rural	no	yes	no	yes	yes	no	no
EPDD-080	positive	no sample	positive	positive	masculine	9	primary	unfavorable	rural	no	no	no	no	no	no	no
EPDD-136	no sample	negative	positive	positive	femenine	8	primary	unfavorable	rural	no	no	no	yes	no	no	no
EPDD-030	negative	no sample	positive	positive	masculine	8	primary	favorable	rural	no	no	no	no	no	no	no
UAO-020	negative	no sample	no sample	negative	masculine	8	primary	favorable	urban	no	no	no	no	no	no	no
EPDD-116	no sample	negative	no sample	negative	masculine	11	primary	unfavorable	rural	no	no	no	no	yes	no	no
EPDD-127	positive	no sample	no sample	positive	masculine	13	primary	unfavorable	rural	no	no	no	yes	no	no	no
EPDD-150	negative	negative	no sample	negative	masculine	8	primary	favorable	rural	no	no	no	no	yes	yes	no
EPDD-076	negative	no sample	no sample	negative	masculine	8	primary	unfavorable	rural	no	no	no	no	no	no	no
UAO-022	negative	no sample	no sample	negative	femenine	7	primary	favorable	urban	no	no	no	no	no	no	no
EPDD-099	negative	negative	no sample	negative	masculine	8	primary	favorable	rural	yes	no	no	no	no	no	no
UAO-002	negative	no sample	no sample	negative	masculine	10	primary	unfavorable	urban	no	no	no	yes	no	no	no
UAO-001	negative	no sample	no sample	negative	femenine	12	secondary	favorable	urban	no	yes	yes	no	yes	no	no
EPDD-091	negative	no sample	no sample	negative	masculine	9	primary	unfavorable	rural	no	no	no	no	yes	no	yes
EPDD-039	negative	no sample	no sample	negative	masculine	8	primary	favorable	rural	no	no	no	no	no	no	no
UAO-006	negative	no sample	no sample	negative	masculine	7	primary	favorable	urban	no	no	no	no	no	no	no
EPDD-147	negative	negative	no sample	negative	femenine	11	primary	favorable	rural	no	no	no	no	yes	no	no
EPDD-062	negative	no sample	no sample	negative	femenine	9	primary	favorable	rural	no	no	no	no	no	no	no
EPDD-093	no sample	negative	no sample	negative	masculine	9	primary	favorable	rural	no	no	no	no	no	no	no
UAO-017	negative	no sample	no sample	negative	masculine	9	primary	unfavorable	urban	no	no	no	no	no	no	no
EPDD-079	negative	negative	no sample	negative	masculine	10	primary	favorable	rural	no	no	no	no	no	no	no
UAO-014	negative	no sample	no sample	negative	masculine	8	primary	unfavorable	urban	no	yes	no	no	no	no	no
UAO-005	negative	no sample	no sample	negative	femenine	8	primary	unfavorable	urban	no	no	no	no	no	no	no
EPDD-094	negative	negative	no sample	negative	masculine	10	primary	unfavorable	rural	no	no	no	no	yes	no	yes
EPDD-131	negative	no sample	no sample	negative	masculine	11	primary	favorable	rural	no	no	no	no	yes	no	no
UAO-019	negative	no sample	no sample	negative	masculine	11	primary	favorable	rural	no	no	no	no	no	no	no
